# Supplementary material
Source: PubMed Central journal article supplement (PMC7364044)
Supplement: MCB.00104-20-s0001.pdf [file MCB.00104-20-s0001.pdf]

Fig. S1

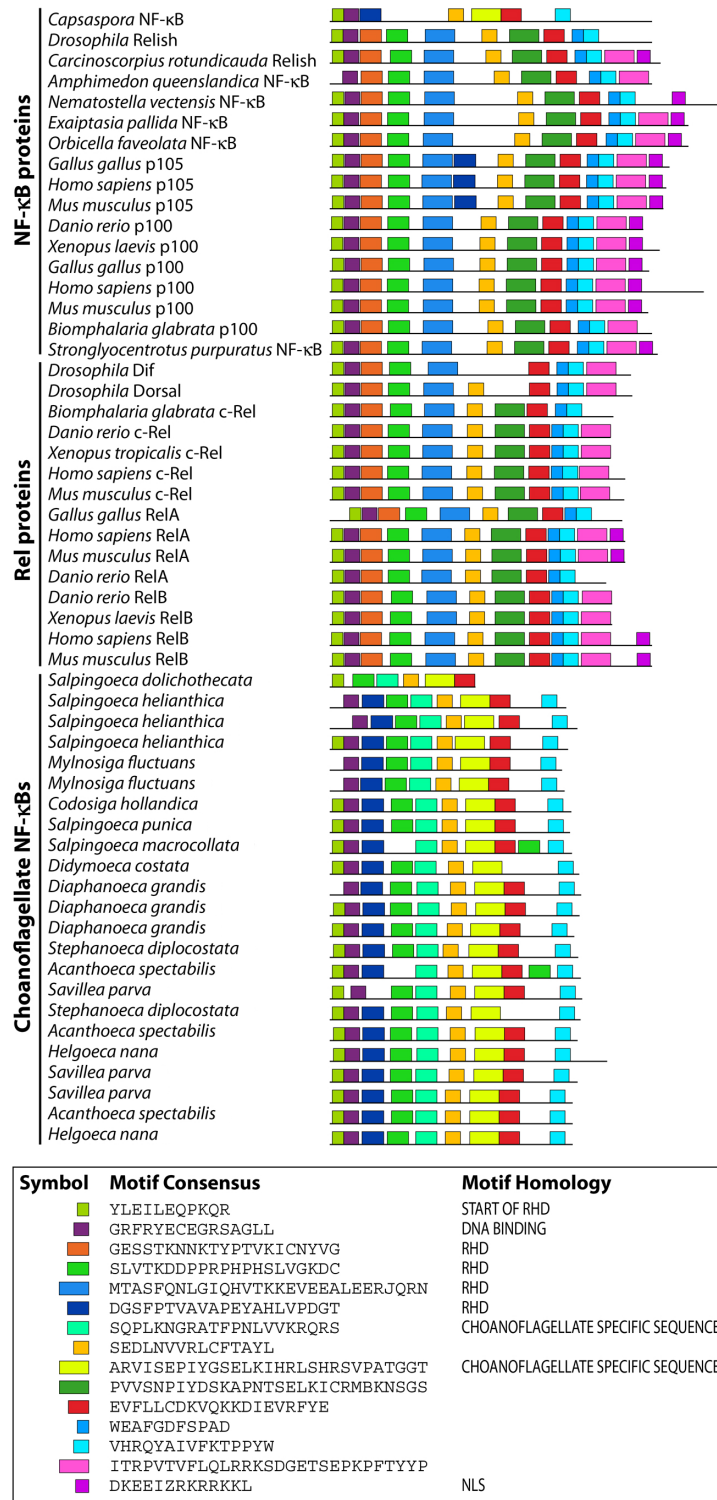

**Figure S1. Motif analysis of NF-κB and Rel proteins.** MEME analysis was performed on each sequence to identify shared motifs. Conserved motifs are highlighted and two choanoflagellate specific sequences are labeled and shown in teal and yellow.

Fig. S2

|                            |                                                                                                    |
|----------------------------|----------------------------------------------------------------------------------------------------|
| Caspase consensus sequence | D-X-X-D-  A/G/S/T |
| Capsaspora                 | aa635-E-N-G-D-S-aa639                                                                              |
| Relish                     | aa541-L-Q-H-D-G-aa546                                                                              |

**Figure S2. Alignment of putative caspase cleavage sites.** The consensus sequence for caspase cleavage is aligned with the known site of DREDD cleavage in *Drosophila* Relish and with a putative caspase site in *Capsaspora* NF- $\kappa$ B. The site of cleavage is marked by a red triangle.
